# Supplementary material for: Whole-body transcriptome mining for candidate effectors from Diuraphis noxia
Source: PubMed Central journal article supplement (PMC9264610; doi:10.1186/s12864-022-08712-4), 2022-07-07

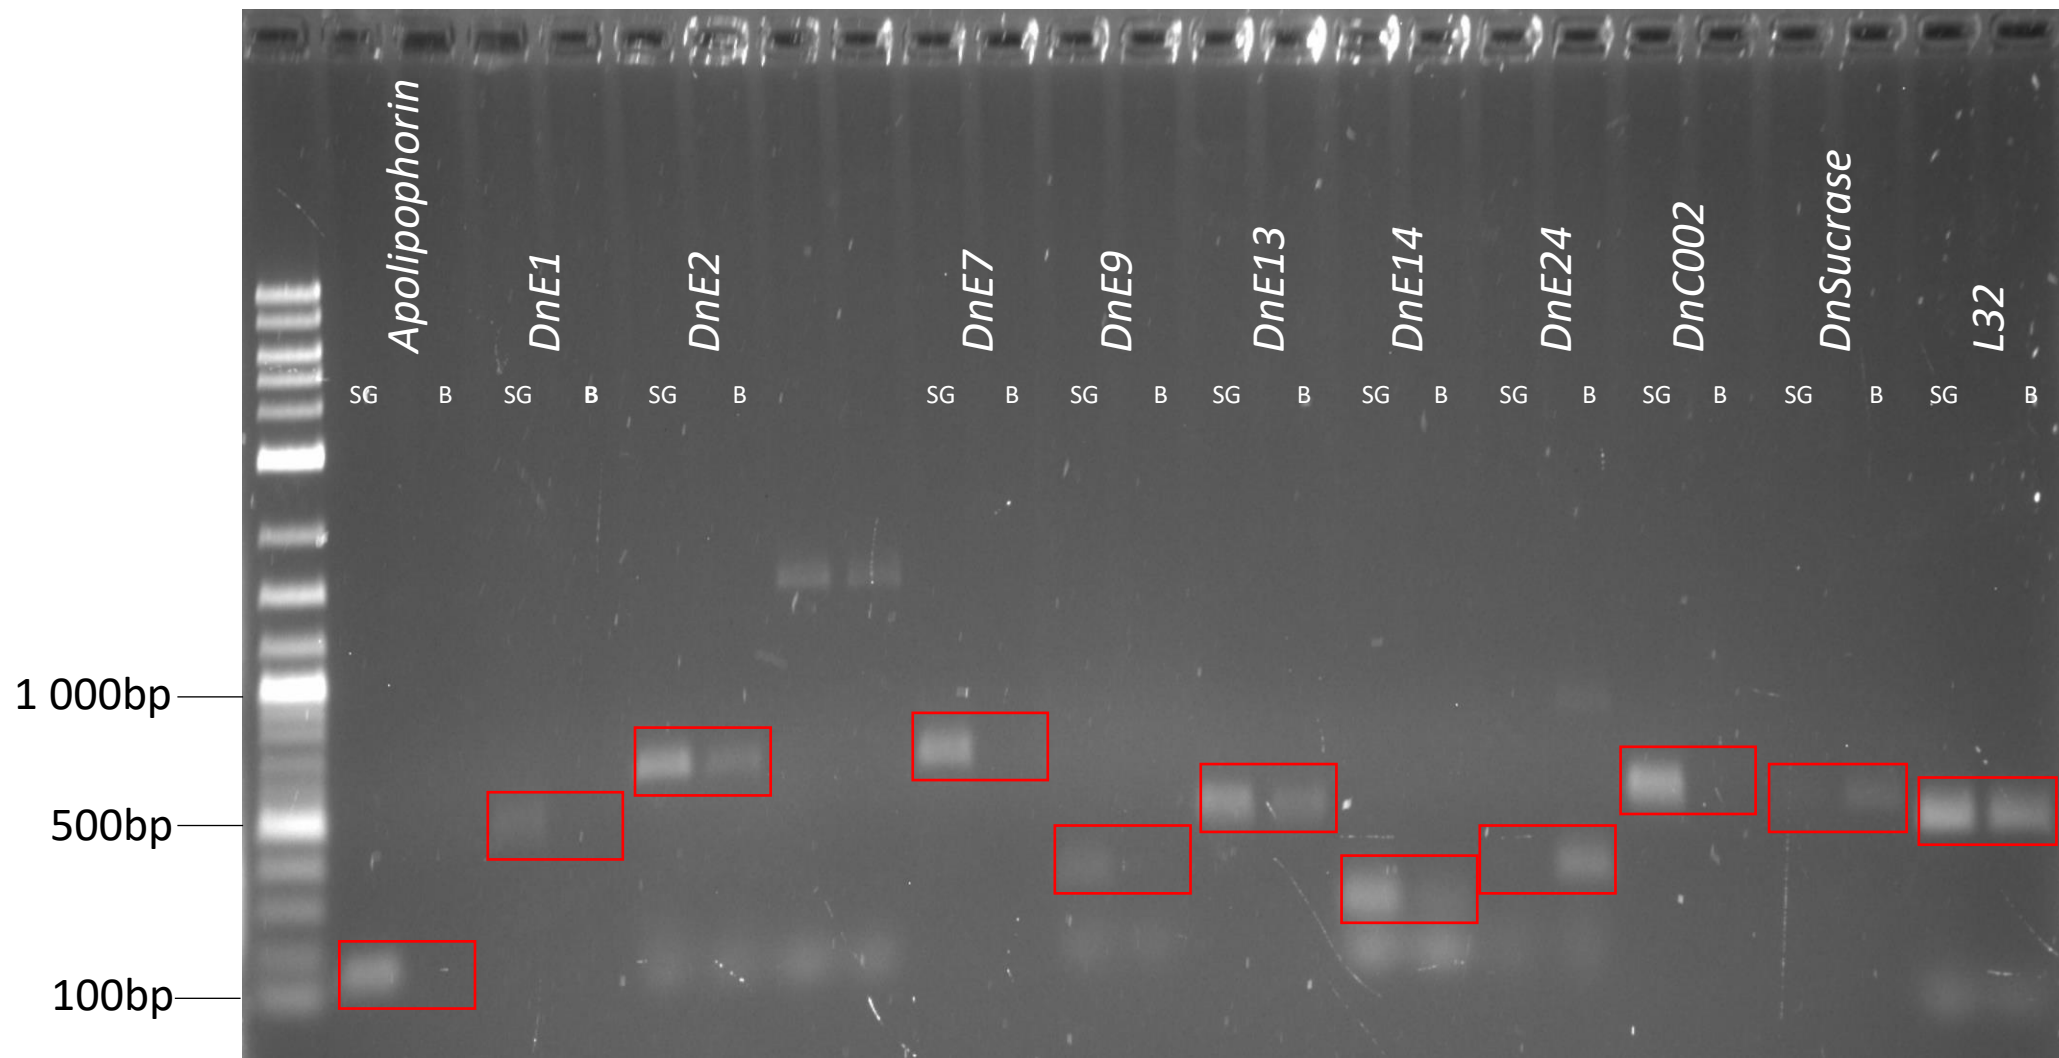

Supplement: 12864_2022_8712_MOESM2_ESM.pdf [file 12864_2022_8712_MOESM2_ESM.pdf]
