# Supplementary material for: Whole-body transcriptome mining for candidate effectors from Diuraphis noxia
Source: PubMed Central journal article supplement (PMC9264610; doi:10.1186/s12864-022-08712-4), 2022-07-07
Supplement: 12864_2022_8712_MOESM4_ESM.pdf [file 12864_2022_8712_MOESM4_ESM.pdf]

**Additional file 4-Table S3: EdgeR and RT-qPCR fold change values for five genes predicted to be significantly upregulated in aphid head tissue. P-values were calculated through applying a t-test against the average  $R_{INDIV}$  values from both head and body tissue obtained from analysing RT-qPCR data through use of the Pfaffl method (Pfaffl, 2001).**

| Gene                                             | edgeR Log <sub>2</sub> FC<br>from comparative<br>RNA-seq datasets<br>(Head vs. Body) | RT-qPCR estimated fold change ** | p-value - L32<br>*** | p-value - L27<br>** |
|--------------------------------------------------|--------------------------------------------------------------------------------------|----------------------------------|----------------------|---------------------|
| Adhesive Plaque Matrix Protein-like              | 6.06                                                                                 | 5.53                             | 5.87E-04             | 6.37E-04            |
| Component of gems protein 1-like                 | 5.02                                                                                 | 13.28                            | 5.92E-06             | 9.58E-06            |
| Prisilkin-39-like                                | 5.11                                                                                 | 3.89                             | 6.28E-07             | 1.22E-06            |
| Vacuolar Protein Sorting-associated Protein TDA6 | 3.10                                                                                 | 1.76                             | 3.66E-04             | 1.49E-04            |
| Skin Secretory Protein xP2-like                  | 3.83                                                                                 | 3.97                             | 3.76E-06             | 3.68E-03            |

\*\*L27 gene used as RT-qPCR normalizer

\*\*\*L32 gene used as RT-qPCR normalizer
