# Supplementary material for: Whole-body transcriptome mining for candidate effectors from Diuraphis noxia
Source: PubMed Central journal article supplement (PMC9264610; doi:10.1186/s12864-022-08712-4), 2022-07-07
Supplement: 12864_2022_8712_MOESM6_ESM.pdf [file 12864_2022_8712_MOESM6_ESM.pdf]

**Additional file 6-Table S5: Primer sequences used in RT-qPCR and RT-PCR analysis. RT-qPCR's were performed on five genes that displayed significant upregulation in the the comparative RNA-seq head dataset vs. that of the RNA-seq body dataset. RT-PCR's were performed on seven putative DnE's and an apolipoprotein.**

| <b>Gene</b>                                      | <b><i>D. noxia</i> gene</b> | <b>Forward primer (5'-3')</b> | <b>Reverse primer (5'-3')</b> | <b>Annealing Temp.</b> |
|--------------------------------------------------|-----------------------------|-------------------------------|-------------------------------|------------------------|
| Adhesive plaque matrix protein-like              | g20974.t2                   | ACACCTGCTGCAGTTTCTGT          | ATGGAGGCTGGTATACGGGT          | 55                     |
| Component of gems protein 1-like                 | g6654.t2                    | AACTACCCGTACAACAGCGG          | TTGTTGGTAAGCGCCGTACT          | 55                     |
| Prisilkin-39-like                                | g4715.t2                    | AATCCCACCACCTGCTTCAG          | AACCGTAAGCTTGGCCGTAA          | 55                     |
| Skin secretory protein xP2-like                  | g11321.t2                   | CGCCACAACCATATCCGGTA          | CACGGGCATGCCGATATAGT          | 55                     |
| Vacuolar protein sorting-associated protein TDA6 | g3085.t2                    | CTACTGCAGCTGTCTTCGCT          | GAAACCGCCGCCAAATCTTT          | 55                     |
| L27                                              | g7580.t2                    | ACCAGCACGATTTTACCAGATTC       | CGTAGCCTGCCCTCGTGTA           | 55                     |
| L32                                              | g3998.t2                    | CGTCTTCGGACTCTGTTGTCAA        | CAAAGTGATCGTTATGACAAACTCAA    | 54                     |
| Apolipoprotein                                   | g7743.t2                    | TGCGTTAGTAGCAGCAACAC          | ATGTCTTCCTTTGCCACT            | 57                     |
| DnE1                                             |                             | GAAAACCTCCGAACCTGCAGC         | TCGGCGTTGTTGATGATTGTT         | 60                     |
| DnE2                                             |                             | CAGCGACGGTAGCGTTACTA          | TGGTCGTATCGGTACCTCCA          | 60                     |
| DnE7                                             |                             | TGACGGCGATCTATCAACCG          | AAAAGTTTTCGAGCACCGCG          | 60                     |
| DnE9                                             |                             | TGGACACGGCTAGGTTCTTG          | ATTCGGCGACTCTGTTGGTG          | 60                     |
| DnE13                                            |                             | TGCTCTTGTCGTTGGTCACA          | TCTGTCATTGATGGTGGGCC          | 60                     |
| DnE14                                            |                             | TGGTAGCCACTGTTGTAGTAGC        | TGTTTTCAAATCGGCAACAACA        | 60                     |
| DnE24                                            |                             | GGCTCCTCAAGGGACCTGAT          | ACACAGTTCGACATGGCTT           | 60                     |
| DnC002                                           | g23817.t2                   | AGAGCAGGAAGAAGTGTCCG          | CAGTCGGCTTCTCATACGGG          | 60                     |
| Sucrase                                          | g998.t2                     | AGACTGGTGGCAAACGGAAA          | GCGGTGAGATTTCCATGTGC          | 60                     |
| L32-RT-PCR                                       | g3998.t2                    | AGCCAAAATATCGCCACAA           | ATACGTGCGTTTCCATTGGT          | 60                     |
